# Supplementary material for: Macrophage migration inhibitory factor - a therapeutic target in gallbladder cancer
Source: Springer Nature journal article supplement (doi:10.1186/s12885-015-1855-z), 2015-11-04
Supplement: MOESM7 [file 9745502]

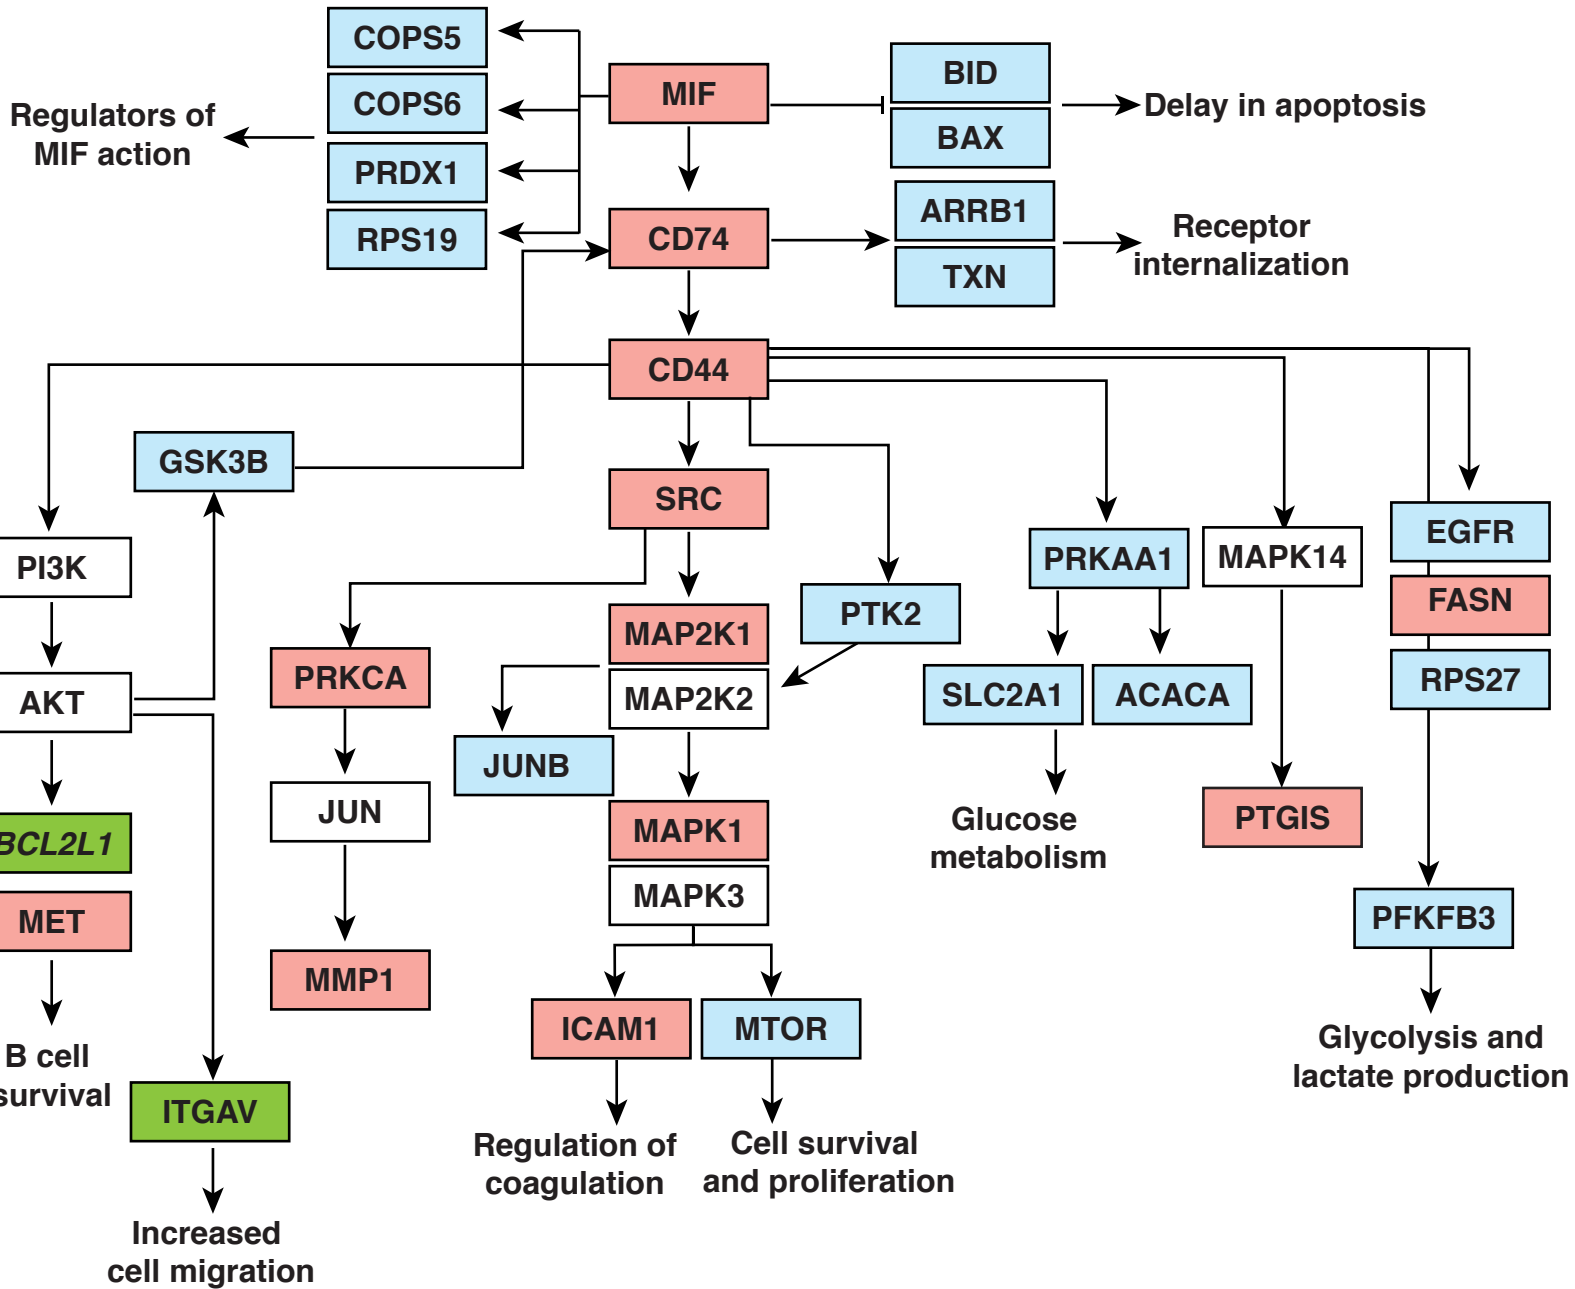

Legend

- Proteins overexpressed in this study
- Proteins downregulated in this study
- Proteins unchanged in this study
- Proteins not identified in this study
