# Supplementary material for: Macrophage migration inhibitory factor - a therapeutic target in gallbladder cancer
Source: Springer Nature journal article supplement (doi:10.1186/s12885-015-1855-z), 2015-11-04

# Additional File 8

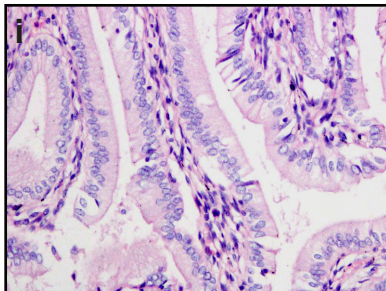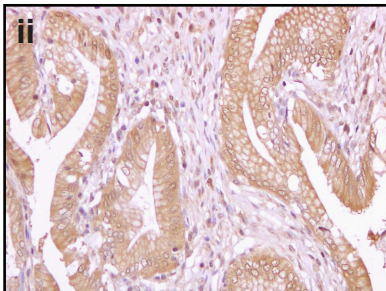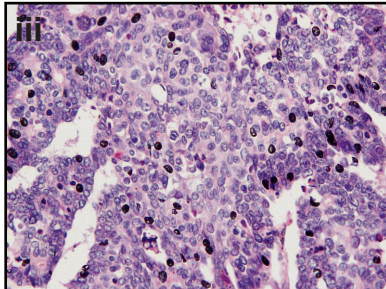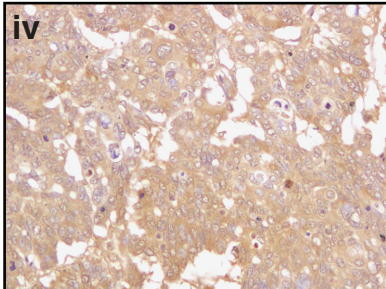

Supplement: MOESM8 [file 9745502]
